# Supplementary material
Source: bioRxiv or medRxiv preprint supplement (https://medrxiv.org/highwire/filestream/80295/field_highwire_adjunct_files/0/2020.05.06.20093724-1.pdf)
Supplement: Supplementary file [file 2020.05.06.20093724-1.pdf]

## Supplementary Appendix

### Suboptimal Personal Protective Equipment Preparedness in Asia-Pacific Intensive Care Units during the COVID-19 Pandemic: A Multinational Survey

#### **Table of Contents**

| <b>Topic</b>                                                                                                                              | <b>Page</b> |
|-------------------------------------------------------------------------------------------------------------------------------------------|-------------|
| 1. sTable 1. Comparison of PPE Guidelines issued by Global, National and Australian State Health Organizations and Professional Societies | <b>2</b>    |
| 2. sTable 2. Perceptions of safety in the ICU                                                                                             | <b>3</b>    |
| 3. sFigure 1: PPE required to manage a COVID patient admitted to ICU                                                                      | <b>4</b>    |
| 4. References for sTable 2                                                                                                                | <b>5</b>    |
| 5. Survey Questionnaire                                                                                                                   | <b>6</b>    |
| 6. Protocol                                                                                                                               | <b>19</b>   |
| 7. Visual abstract                                                                                                                        | <b>24</b>   |

**sTable 1. Comparison of PPE Guidelines issued by Global, National and Australian State Health Organizations and Professional Societies**

| Suspected / confirmed COVID | Recommending body           | Type of precaution for an ICU patient | Medical (Surgical) Mask | High Particulate respirators (N95 / FFP2) | Gown | Gloves | Goggles | Face shield | Cap | Shoe cover | Fit test of N95 mask | Fit check of N95 mask | Buddy | PAPR     | Scrubs | Shower |
|-----------------------------|-----------------------------|---------------------------------------|-------------------------|-------------------------------------------|------|--------|---------|-------------|-----|------------|----------------------|-----------------------|-------|----------|--------|--------|
| No-AGP                      | WHO <sup>1</sup>            | Droplet                               | R                       | NR                                        | R    | R      | R       | O           | NM  | NM         | NM                   | NM                    | NM    | NM       | NM     | NM     |
|                             | CDC <sup>2</sup>            | Droplet                               | A                       | O                                         | R    | R      | R       | O           | NM  | NM         | NM                   | NM                    | NM    | NM       | NM     | NM     |
|                             | ANZICS <sup>3</sup>         | Airborne                              | NR                      | R                                         | R    | R      | R       | O           | NM  | NM         | NM                   | R                     | R     | N        | R      | R      |
|                             | - Victoria <sup>4</sup>     | Droplet                               | R                       | R                                         | R    | R      | R       | R           | NM  | NM         | R                    | NM                    | NM    | NM       | NM     | NM     |
|                             | - NSW <sup>5</sup>          | Droplet                               | R                       | NR                                        | R    | R      | R       | R           | O   | NM         | NM                   | R                     | NM    | consider | NM     | NM     |
|                             | - SA <sup>6</sup>           | Droplet                               | R                       | R                                         | R    | R      | R       | R           | NM  | NM         | NM                   | NM                    | NM    | NM       | NM     | NM     |
|                             | - Queensland <sup>7</sup>   | Droplet                               | R                       | R                                         | R    | R      | R       | R           | NM  | NM         | NM                   | NM                    | R     | NM       | NM     | NM     |
|                             | - WA <sup>8</sup>           | Droplet                               | NR                      | R                                         | R    | R      | R       | R           | NM  | NM         | NM                   | NM                    | NM    | NM       | R*     | NM     |
|                             | - Tasmania <sup>9</sup>     | Droplet                               | NR                      | R                                         | R    | R      | R       | R           | NM  | NM         | NM                   | NM                    | NM    | NM       | NM     | NM     |
|                             | - ACT <sup>10</sup>         | Droplet                               | NR                      | R                                         | R    | R      | R       | R           | R   | NM         | NM                   | NM                    | R     | NM       | NM     | NM     |
|                             | - NT <sup>11</sup>          | Droplet                               | R                       | R                                         | R    | R      | R       | R           | NM  | NM         | NM                   | R                     | NM    | NM       | NM     | NM     |
|                             | - New Zealand <sup>12</sup> | Droplet                               | R                       | R                                         | R    | R      | R       | R           | R   | NM         | NM                   | NM                    | NM    | NM       | NM     | NM     |
|                             | - Hong Kong <sup>13</sup>   | Droplet                               | R                       | R                                         | R    | R      | R       | R           | R   | O          | NM                   | NM                    | NM    | NM       | NM     | NM     |
|                             | India <sup>11</sup>         | NM                                    | R                       | R                                         | R    | R      | R       | R           | R   | R          | R                    | NM                    | NM    | NM       | NM     | NM     |
| Philippines <sup>14</sup>   | NM                          | R                                     | NR                      | R                                         | R    | R      | R       | NM          | NM  | NM         | NM                   | NM                    | NM    | NM       | NM     |        |
| AGP                         | WHO <sup>1</sup>            | Airborne                              | NR                      | R                                         | R    | R      | R       | O           | NM  | NM         | NM                   | NM                    | NM    | NM       | NM     | NM     |
|                             | CDC <sup>2</sup>            | Airborne                              | NR                      | R                                         | R    | R      | R       | O           | NM  | NM         | NM                   | NM                    | NM    | NM       | NM     | NM     |
|                             | ANZICS <sup>3</sup>         | Airborne                              | NR                      | R                                         | R    | R      | R       | O           | R   | NR         | S                    | R                     | R     | Training | R      | R      |
|                             | - Victoria <sup>4</sup>     | Airborne                              | NR                      | R                                         | R    | R      | R       | R           | NM  | NM         | R                    | R                     | NM    | NM       | NM     | NM     |
|                             | - NSW <sup>5</sup>          | Airborne                              | NR                      | R                                         | R    | R      | R       | R           | NM  | NM         | R                    | R                     | NM    | R*       | NM     | NM     |
|                             | - SA <sup>6</sup>           | Airborne                              | NR                      | R                                         | R    | R      | R       | R           | NM  | NM         | R                    | R                     | NM    | NM       | NM     | NM     |
|                             | - Queensland <sup>7</sup>   | Airborne                              | NR                      | R                                         | R    | R      | R       | R           | NM  | NM         | NM                   | R                     | NM    | NM       | NM     | NM     |
|                             | - WA <sup>8</sup>           | Airborne                              | NR                      | R                                         | R    | R      | R       | R           | NM  | NM         | NM                   | R                     | NM    | R*       | NM     | NM     |
|                             | - Tasmania <sup>9</sup>     | Airborne                              | NR                      | R                                         | R    | R      | R       | R           | NM  | NM         | NM                   | R                     | NM    | NM       | NM     | NM     |
|                             | - ACT <sup>10</sup>         | Airborne                              | NR                      | R                                         | R    | R      | R       | R           | R   | NM         | NM                   | R                     | NM    | NA       | NM     | NM     |
|                             | - NT <sup>11</sup>          | Airborne                              | NR                      | R                                         | R    | R      | R       | R           | NM  | NM         | NM                   | R                     | NM    | NM       | NM     | NM     |
|                             | - New Zealand <sup>12</sup> | Airborne                              | NR                      | R                                         | R    | R      | R       | R           | R   | NM         | NM                   | NM                    | R     | NM       | NM     | NM     |
|                             | - Hong Kong <sup>13</sup>   | Airborne                              | NR                      | R                                         | R    | R      | R       | R           | R   | O          | NM                   | NM                    | NM    | NM       | NM     | NM     |
|                             | India <sup>15</sup>         | Airborne                              | NR                      | R                                         | R    | R      | R       | R           | R   | R          | NM                   | NM                    | NM    | NM       | NM     | NM     |
| Philippines <sup>14</sup>   | Airborne                    | NR                                    | R                       | R                                         | R    | R      | R       | R           | NM  | NM         | NM                   | NM                    | NM    | NM       | NM     |        |

**COVID-19 – Coronavirus disease of 2019, AGP – aerosol generating procedure, WHO – World Health Organisation; CDC – Centers for Disease Control and Prevention; ANZICS – Australia New Zealand Intensive Care Society, NSW – New South Wales, SA, South Australia, WA – Western Australia, ACT – Australian Capital Territory, NT – Northern Territory R – recommended, NR – not recommended, NM – not mandated, A – alternative, O – optional, S – Suggest (not recommend), NA not available, PAPR – powered air-purifying respirator, N95 – not-resistant to oil-based aerosols, FFP2 – filtering facepiece-2  
\* if available**

| <b>sTable 2. Perceptions of Safety in the ICU</b>                        |                     |                |                        |
|--------------------------------------------------------------------------|---------------------|----------------|------------------------|
|                                                                          | <b>Highly agree</b> | <b>Neutral</b> | <b>Highly disagree</b> |
| <b>I feel very safe n (%)</b>                                            |                     |                |                        |
| • Australia                                                              | 20 (29.4)           | 35 (51.5)      | 13 (19.1)              |
| • Hong Kong                                                              | 6 (50.0)            | 6 (50.0)       | 0 (0.0)                |
| • India                                                                  | 26 (22.6)           | 49 (42.6)      | 40 (34.8)              |
| • New Zealand (only 12 out of 14 completed this question)                | 8 (57.1)            | 5 (35.7)       | 1 (7.1)                |
| • Philippines                                                            | 1 (6.3)             | 3 (18.8)       | 12 (75.0)              |
| • Singapore                                                              | 4 (66.7)            | 2 (33.3)       | 0 (0.0)                |
| <b>PPE practice is suboptimal to prevent healthcare worker infection</b> |                     |                |                        |
| • Australia                                                              | 21 (30.9)           | 29 (42.6)      | 18 (26.5)              |
| • Hong Kong                                                              | 0 (0.0)             | 3 (25.0)       | 9 (75.0)               |
| • India                                                                  | 65 (56.5)           | 29 (25.2)      | 21 (18.3)              |
| • New Zealand (only 12 out of 14 completed this question)                | 2 (14.3)            | 3 (21.4)       | 9 (64.3)               |
| • Philippines                                                            | 3 (18.8)            | 7 (43.8)       | 6 (37.5)               |
| • Singapore                                                              | 0 (0.0)             | 1 (16.7)       | 5 (83.3)               |
| <b>I wish PPE stock building started 2 months ago</b>                    |                     |                |                        |
| • Australia                                                              | 47 (69.1)           | 18 (26.5)      | 3 (4.4)                |
| • Hong Kong                                                              | 9 (75.0)            | 3 (25.0)       | 0 (0.0)                |
| • India                                                                  | 68 (59.1)           | 26 (22.6)      | 21 (18.3)              |
| • New Zealand (only 12 out of 14 completed this question)                | 5 (35.7)            | 5 (35.7)       | 4 (28.6)               |
| • Philippines                                                            | 10 (62.5)           | 4 (25.0)       | 2 (12.5)               |
| • Singapore                                                              | 1 (16.7)            | 2 (33.3)       | 3 (50.0)               |

Figure 1: PPE Practices in Each Country to Manage COVID-19 patients Admitted to ICU

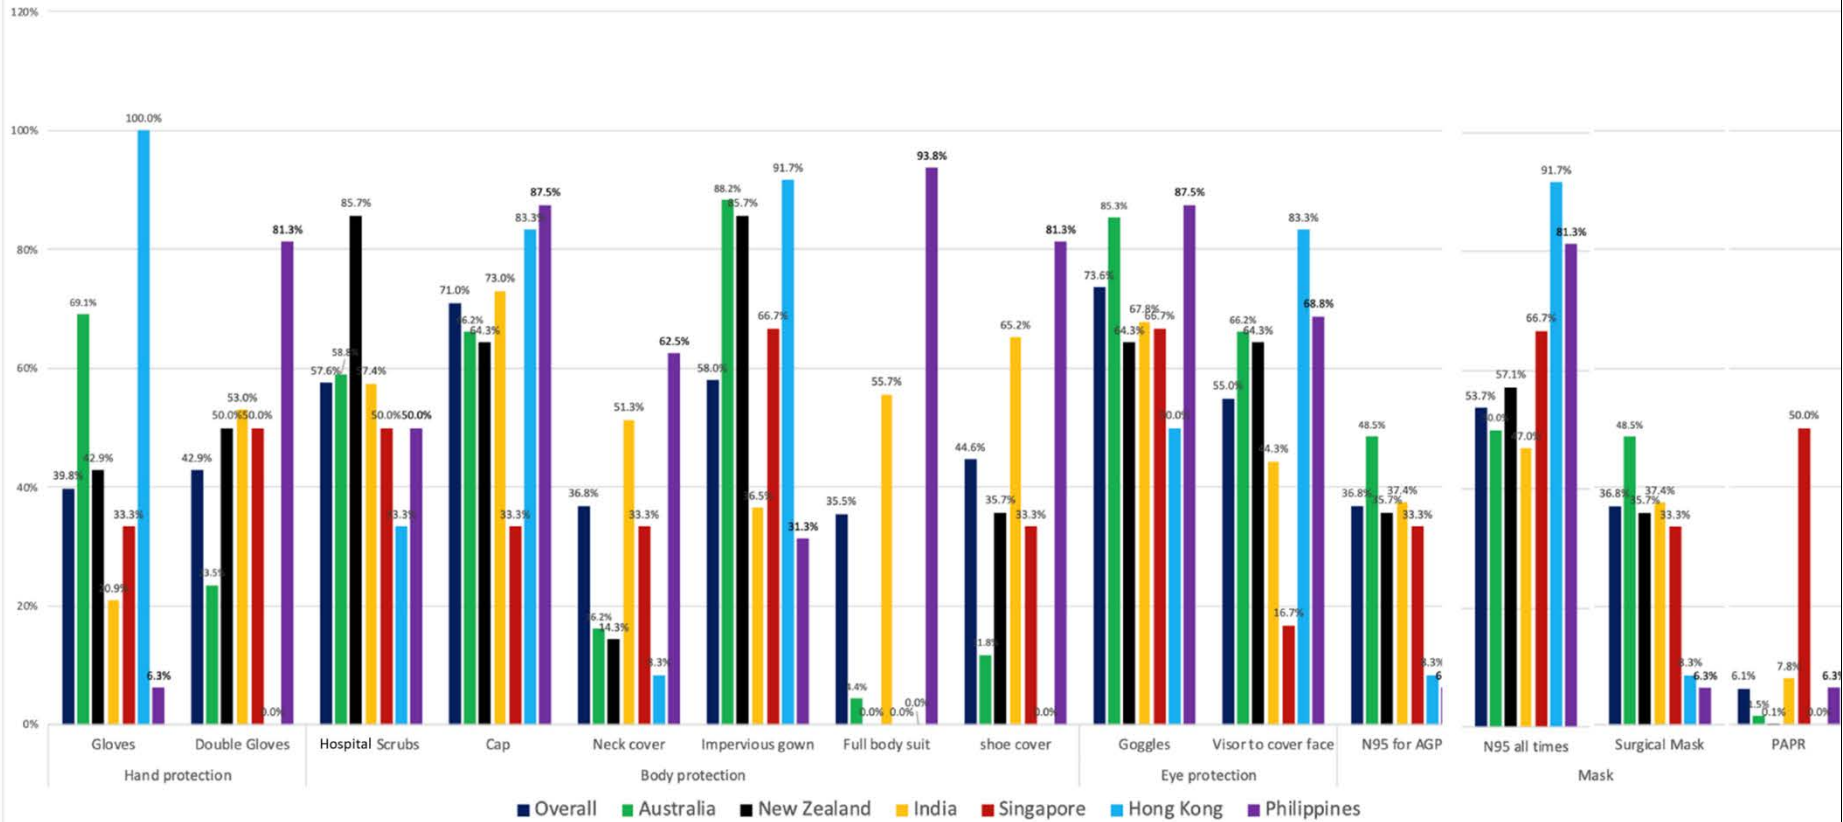

PAPR – Positive air-purifying respirator, AGP – aerosol generating procedures, N95 – not-resistant to oil-based aerosols  
Hospital

#### References for sFigure 1

1. World Health O. Rational use of personal protective equipment for coronavirus disease (COVID-19): interim guidance, 27 February 2020. Geneva: World Health Organization; 2020.
2. Interim Infection Prevention and Control Recommendations for Patients with Suspected or Confirmed Coronavirus Disease 2019 (COVID-19) in Healthcare Settings. National Center for Immunization and Respiratory Diseases (NCIRD), Division of Viral Diseases, 2020. (Accessed April 9, 2020, at <https://www.cdc.gov/coronavirus/2019-ncov/hcp/infection-control-recommendations.html>.)
3. ANZICS COVID-19 Guidelines). Australian and New Zealand Intensive Care Society (ANZICS), 2020. (Accessed March 31 2020, 2020, at <https://www.anzics.com.au/wp-content/uploads/2020/03/ANZICS-COVID-19-Guidelines-Version-1.pdf>.)
4. Coronavirus (COVID-19) Healthcare worker personal protective equipment (PPE) guidance  
Victorian Department of Health and Human Services, 2020. (Accessed 9 April 2020, at <https://www.dhhs.vic.gov.au/health-services-and-general-practitioners-coronavirus-disease-covid-19>.)
5. COVID-19 Infection Prevention and Control Advice for Health Workers. NSW Health and the Clinical Excellence Commission. (Accessed April 9, 2020, at [http://cec.health.nsw.gov.au/\\_data/assets/pdf\\_file/0010/575362/COVID-19-Infection-Prevention-and-Control-Advice-for-Health-Workers-V2.pdf](http://cec.health.nsw.gov.au/_data/assets/pdf_file/0010/575362/COVID-19-Infection-Prevention-and-Control-Advice-for-Health-Workers-V2.pdf).)
6. COVID-19 Personal Protective Equipment Assessment Matrix. Government of South Australia. (Accessed April 9, 2020, at <https://www.sahealth.sa.gov.au/wps/wcm/connect/789e7662-293c-4125-a1b0-c062cef5ea0e/20015.18-COVID+assessment+matrix+-+FINAL+-+08042020.pdf?MOD=AJPERES&CACHEID=ROOTWORKSPACE-789e7662-293c-4125-a1b0-c062cef5ea0e-n5p1Unm>.)
7. Interim infection prevention and control guidelines for the management of COVID-19 in healthcare settings Queensland Government, 2020. (Accessed March 31, 2020,
8. Coronavirus Disease- 2019 (COVID-19) Infection Prevention and Control in the Hospital Setting Government of Western Australia Department of Health. (Accessed April 11 2020, 2020, at <https://ww2.health.wa.gov.au/~media/Files/Corporate/general%20documents/Infectious%20diseases/PDF/Coronavirus/Infection%20Prevention%20and%20Control%20in%20Hospitals.pdf>.)
9. Tasmanian Infection Prevention and Control. (Accessed March 31, 2020, at [https://www.dhhs.tas.gov.au/publichealth/tasmanian\\_infection\\_prevention\\_and\\_control\\_unit](https://www.dhhs.tas.gov.au/publichealth/tasmanian_infection_prevention_and_control_unit).)
10. COVID-19 – frequently-asked questions for general practitioners. ACT Health. (Accessed April 9, 2020, at [https://www.health.act.gov.au/sites/default/files/2020-03/COVID-19%20FAQs%20for%20GPs\\_06032020.pdf](https://www.health.act.gov.au/sites/default/files/2020-03/COVID-19%20FAQs%20for%20GPs_06032020.pdf).)
11. A focus on: Coronavirus (COVID-19): Personal Protection Equipment. NT Health Library Services. (Accessed April 9, 2020, at <https://library.health.nt.gov.au/COVID-19/PPE>.)
12. COVID-19: Advice for essential workers, including personal protective equipment  
Department of Health, New Zealand, 2020. (Accessed April 9., 2020, at <https://www.health.govt.nz/system/files/documents/pages/covid-19-guidelines-use-ppe-frontline-health-care-workers-7apr20.pdf>.)
13. Key Elements on Prevention and Control of Coronavirus disease (COVID-19) in Healthcare Settings (Interim) Centre for Health Protection, Department of Health, Hong Kong. (Accessed March 31, 2020, at [https://www.chp.gov.hk/files/pdf/ic\\_advice\\_for\\_nid\\_in\\_healthcare\\_setting.pdf](https://www.chp.gov.hk/files/pdf/ic_advice_for_nid_in_healthcare_setting.pdf).)
14. Reiteration of the Interim Guidelines for the Novel Coronavirus Acute Respiratory Disease (2019 nCoV-ARD)Response in Hospitals and Other Health Facilities. Department of Health, Republic of Philippines, 2020. (Accessed March 31, 2020, at <https://www.doh.gov.ph/sites/default/files/health-update/DC2020-0049-Reiteration-of-DM2020-0072-Interim-Guidelines-for-2019-nCoV-ARD-Response-in-Hospitals-and-Other-Health-Facilities.pdf>.)
15. National Guidelines For Infection Prevention And Control In Healthcare Facilities. Ministry of Health and Family Welfare, Republic of India, 2020. (Accessed March 31, 2020, at <https://www.mohfw.gov.in/pdf/National%20Guidelines%20for%20IPC%20in%20HCF%20-%20final%281%29.pdf>.)

# Questionnaire

## ICU Survey on COVID-19 PPE and Preparation

Information for Participants:

Personal Protective Equipment (PPE) are fundamental to protecting healthcare workers against COVID-19. A pilot survey revealed variable PPE practices in Australasian ICUs, particularly when compared to videos on social media on PPE from other parts of the world. This survey seeks to inform the Australasian Intensive Care Community about PPE practices available in various hospitals. The results will be compared to published Australasian PPE guidelines, and may potentially be used to change practice.

You are invited to participate in this survey because you are an Australasian Intensivist. Participation is voluntary. By participating, you are providing consent for the study results to be used for publication. You will not receive any monetary benefits. There may be benefits to the larger Australasian ICU community if PPE practices become more streamlined.

It is expected that the de-identified results of this survey will be submitted to a peer-reviewed publication in a scientific journal. No personal details of yourself or your hospital will be provided.

We expect that it will take you 10 minutes to complete the survey.

The study protocol and survey has been approved by the Nepean Blue Mountains Local Health District Human Research Ethics Committee (NBMLHD HREC) (approval number 2020/ETH00705).

If you have any questions about the study then you may seek clarifications from the Principal Investigator Dr Arvind Rajamani on [rrarvind@hotmail.com](mailto:rrarvind@hotmail.com) or

Co-Investigators

Dr Ashwin Subramaniam Frankston Hospital ([ashwin.subramaniam@monash.edu](mailto:ashwin.subramaniam@monash.edu)) and

Dr Kollengode Ramanathan on [ram\\_ramanathan@nuhs.edu.sg](mailto:ram_ramanathan@nuhs.edu.sg).

If you have any complaints about the study or the way it is being conducted, please contact the NBMLHD HREC Officer on (02) 47343441 or via Email: [NBMLHD-Ethics@health.nsw.gov.au](mailto:NBMLHD-Ethics@health.nsw.gov.au)

\* Required

1. Your state/territory \*

*Mark only one oval.*

- New Zealand
- ACT
- NSW
- Northern Territory
- QLD
- South Australia
- TAS
- VIC
- WA
- Singapore
- Hong Kong
- Other: \_\_\_\_\_

2. Your hospital \*

\_\_\_\_\_

3. What is the proposed location to treat confirmed COVID patients requiring ICU admission? \*

More than one answer may be chosen

*Check all that apply.*

- Negative pressure-room
- Negative flow room
- Neutral pressure single room in a general pod with other non-COVID patients
- Cohorted with other COVID patients in a dedicated COVID pod

Other:  \_\_\_\_\_



4. A young well-functioning patient has confirmed COVID. His resp rate is 30/min with Sats ~80-85% on room air. Other systems are normal. What O2 therapy is considered appropriate in your hospital? \*

More than one answer may be chosen

Check all that apply.

|                                            | Not an option in COVID   | In negative pressure room | Neutral-pressure single room | Ward or Dedicated ICU pod of cohorted COVID patients |
|--------------------------------------------|--------------------------|---------------------------|------------------------------|------------------------------------------------------|
| <b>Low flow nasal prongs (&lt;6 L/min)</b> | <input type="checkbox"/> | <input type="checkbox"/>  | <input type="checkbox"/>     | <input type="checkbox"/>                             |
| <b>High-flow nasal prongs</b>              | <input type="checkbox"/> | <input type="checkbox"/>  | <input type="checkbox"/>     | <input type="checkbox"/>                             |
| <b>CPAP</b>                                | <input type="checkbox"/> | <input type="checkbox"/>  | <input type="checkbox"/>     | <input type="checkbox"/>                             |
| <b>BIPAP</b>                               | <input type="checkbox"/> | <input type="checkbox"/>  | <input type="checkbox"/>     | <input type="checkbox"/>                             |

5. As of today, what is your current ICU policy for PPE when you are in the same room as a confirmed COVID patient? \*

More than one answer may be chosen

*Check all that apply.*

- Hospital scrubs
- Cap
- Neck cover (hood / surgical gown from theatres)
- Protective goggles
- Visor to cover face
- Impervious plastic gown with loose neck-fitting
- Always 2 pairs of gloves ("double-glove")
- Only 1 pair of gloves
- N95 (or P2) mask only for aerosol-generating procedures and Simple surgical mask for non-aerosol-generating cares
- N95 (or P2) mask at all times
- Full body suit
- PAPR
- Shoe covers

Other:  \_\_\_\_\_

6. Do you have a "buddy-system" to check PPE practice? \*

More than one answer may be chosen

*Mark only one oval.*

- Not mandatory (ad hoc)
- "Buddy-system" mandatory EVERY time to check donning and doffing
- "Buddy-system" to check donning and doffing, but not always
- Other: \_\_\_\_\_

7. Showering / shampooing after caring for a COVID patient \*

More than one answer may be chosen

*Check all that apply.*

- Immediately shower and shampoo after every single patient-contact episode
- Only shower and shampoo if PPE was breached
- Only shower /shampoo at the end of your shift
- No advice/guideline given
- Limited bathrooms available

Other:  \_\_\_\_\_

8. For the N95 or P2 mask, does your hospital provide a fit-testing using either quantitative or qualitative (odour-detection) methods? \*

*Mark only one oval.*

Yes

No

Other: \_\_\_\_\_

9. What training has been instituted to prepare for COVID-19? \*

Mark only one oval per row.

|                                                                 | Daily                 | Frequently            | Occasional / Sporadic | Not done so far       | Not aware of this     |
|-----------------------------------------------------------------|-----------------------|-----------------------|-----------------------|-----------------------|-----------------------|
| <b>Simulation sessions on intubating a COVID patient</b>        | <input type="radio"/> | <input type="radio"/> | <input type="radio"/> | <input type="radio"/> | <input type="radio"/> |
| <b>Simulation sessions on transporting COVID patient</b>        | <input type="radio"/> | <input type="radio"/> | <input type="radio"/> | <input type="radio"/> | <input type="radio"/> |
| <b>Donning and Doffing PPE</b>                                  | <input type="radio"/> | <input type="radio"/> | <input type="radio"/> | <input type="radio"/> | <input type="radio"/> |
| <b>Specific training for cleaners on PPE and waste disposal</b> | <input type="radio"/> | <input type="radio"/> | <input type="radio"/> | <input type="radio"/> | <input type="radio"/> |

10. What family visitation / communication strategies have you decided for COVID patients? \*

*Mark only one oval.*

- Nothing decided yet
- No changes to current visiting rights
- No family visits allowed. Phone communications only
- Brief visits allowed in full PPE
- Video conferencing for family
- Not aware of this
- Other: \_\_\_\_\_

11. Have you set up specialized a "COVID Intubation Team" to intubate suspected/confirmed COVID patients? \*

*Mark only one oval.*

- Yes, with anesthetists and intensivists
- Yes, with senior intensivists only
- No
- Other: \_\_\_\_\_

12. Is the current stock of essential PPE equipment adequate to manage 3 confirmed COVID patients in your ICU for at least 1 week? \*

*Mark only one oval.*

- Yes
- No
- Not aware of stock
- Other: \_\_\_\_\_

13. Have you been advised to reuse PPE equipment to manage the stock? \*

Mark only one oval per row.

|                                                              | We never reuse disposable PPE | We reuse only if no contact with known/suspected COVID | We reuse even if there is contact with known/suspected COVID |
|--------------------------------------------------------------|-------------------------------|--------------------------------------------------------|--------------------------------------------------------------|
| <b>We reuse simple surgical mask</b>                         | <input type="radio"/>         | <input type="radio"/>                                  | <input type="radio"/>                                        |
| <b>We reuse N95 mask</b>                                     | <input type="radio"/>         | <input type="radio"/>                                  | <input type="radio"/>                                        |
| <b>We wash and reuse any mask</b>                            | <input type="radio"/>         | <input type="radio"/>                                  | <input type="radio"/>                                        |
| <b>We reuse any mask after sterilizing in microwave/oven</b> | <input type="radio"/>         | <input type="radio"/>                                  | <input type="radio"/>                                        |



14. Please describe what constitutes a "breach in PPE" in your hospital. What measures do you take when a breach is identified?

If unaware, state "not aware"

---

---

---

---

---

15. Do you feel safe/secure and adequately protected with the PPE methods offered by your hospital/ICU? \*

Mark only one oval per row.

|                                                                                                                 | Highly agree          | Highly disagree       | Neutral               |
|-----------------------------------------------------------------------------------------------------------------|-----------------------|-----------------------|-----------------------|
| <b>I feel highly safe/secure and well-protected</b>                                                             | <input type="radio"/> | <input type="radio"/> | <input type="radio"/> |
| <b>I wish the hospital had started procuring PPE 2 months ago</b>                                               | <input type="radio"/> | <input type="radio"/> | <input type="radio"/> |
| <b>Current PPE practice is suboptimal. Therefore, I think many healthcare workers are going to get infected</b> | <input type="radio"/> | <input type="radio"/> | <input type="radio"/> |

## Study Protocol

# A Survey on the Current State of Personal Protective Equipment Use in Australasian Intensive Care Units in the Midst of the COVID-19 Pandemic

Principal Investigator – Dr Arvind Rajamani, Senior Staff Specialist, Nepean Hospital, Kingswood, NSW

Co-investigator – Dr Ashwin Subramaniam, Staff Specialist, Frankston Hospital, Frankston, VIC.

## Background

Australasia is currently in the midst of the COVID-19 pandemic with a rising number of infected patients requiring treatment in an Intensive Care Unit (ICU). The case fatality rate of COVID-19 infections has been estimated to be approximately 2.2%.<sup>1</sup> Health care workers (HCWs), particularly in the ICU, are susceptible to acquiring infections from infected patients.<sup>2</sup> Personal-protective equipment are the cornerstone of strategies to protect HCW from being infected with transmissible microbes. However, a qualitative study on infectious agent transmission precaution practices in hospitals identified a large number of potential breaches in PPE use.<sup>3</sup> An informal survey of Australasian intensivists on social media groups raised the possibility of significant deficiencies in the availability of Personal Protective Equipment, and a lack of clear local policies to regulate and scrutinize their use. For instance, logistic difficulties with the availability of PPE and limitations on training personnel prevented one New South Wales hospital to fully adhere to the PPE guideline issued by the NSW Clinical Excellence Commission.<sup>4</sup> We propose to do a questionnaire survey to ascertain the availability and practices on PPE in Australasian ICUs. This may give important information for public policy planning in the midst of the current COVID-19 epidemic. It is expected that the results of this survey will be submitted for publication in a peer-reviewed journal.

## Methods

### Design and development of the survey questionnaire

The broad research topic (current state of personal protective equipment use in Australasian ICUs) was determined by discussions between intensivists and a clinical microbiologist. A literature search showed that there were no previous studies on this topic. With the input of the content experts, the following domains were chosen for the survey – risk factors for transmission were identified as location within the hospital for managing COVID patients, aerosol-generating procedures (method of oxygen-delivery, high-flow nasal prongs, noninvasive ventilation, intubation); availability of PPE, practices on donning and doffing, training and education, N95 mask fit-testing, and staff satisfaction on the available measures in their hospital.

The first draft questionnaire (Version 1) was designed by the first author and given to 2 intensivists to improve clarity and minimize ambiguity. The redrafted questionnaire was retested for and finalized (attached).

## Distribution of the survey

An electronic questionnaire with the survey questions will be created using Google Forms™. Apart from the name of the hospital, no identifying details will be collected. The survey will be distributed by email, text messaging and/or WhatsApp to one intensivist from each Level 4, 5 and 6 ICU in Australasia. Two reminders will be emailed 3 days apart. The preamble to the form will contain the relevant information for participants, including contact details of the Principal Investigator and the Ethics Committee officer for lodgment of complaints. Consent is implied by their informed participation. No incentives will be offered, financial or otherwise.

## Statistical Analysis

The survey results will be expressed in numbers and percentages. Information will be collated per domain to summarize the available information.

## References

1. Zhao S, Lin Q, Ran J, et al. Preliminary estimation of the basic reproduction number of novel coronavirus (2019-nCoV) in China, from 2019 to 2020: A data-driven analysis in the early phase of the outbreak. *Int J Infect Dis.* 2020;92:214-217.
2. Schwartz J KC, Yen M. Protecting Health Care Workers during the COVID-19 Coronavirus Outbreak –Lessons from Taiwan's SARS response. *Clinical Infectious Diseases.* 2020
3. Krein SL, Mayer J, Harrod M, et al. Identification and Characterization of Failures in Infectious Agent Transmission Precaution Practices in Hospitals: A Qualitative Study. *JAMA Intern Med.* 2018;178(8):1016-1057.
4. <http://www.cec.health.nsw.gov.au/keep-patients-safe/infection-prevention-and-control/Coronavirus-COVID-19/standard-and-transmission-based-precautions-including-ppe>.

# A Survey on the Current State of Personal Protective Equipment Use in Australasian Intensive Care Units in the Midst of the COVID-19 Pandemic

Principal Investigator – Dr Arvind Rajamani, Senior Staff Specialist, Nepean Hospital, Kingswood, NSW

Co-investigator – Dr Ashwin Subramaniam, Staff Specialist, Frankston Hospital, Frankston, VIC.

Shailesh Bihari (MBBS, MD, FCICM, PhD)

Associate Professor College of Medicine and public health – Flinders university – Bedford park – SA

ICU consultant – Flinders Medical Centre – Bedford park - SA

## Background

Australasia is currently in the midst of the COVID-19 pandemic with a rising number of infected patients requiring treatment in an Intensive Care Unit (ICU). The case fatality rate of COVID-19 infections has been estimated to be approximately 2.2%.<sup>1</sup> Health care workers (HCWs), particularly in the ICU, are susceptible to acquiring infections from infected patients.<sup>2</sup> Personal-protective equipment are the cornerstone of strategies to protect HCW from being infected with transmissible microbes. However, a qualitative study on infectious agent transmission precaution practices in hospitals identified a large number of potential breaches in PPE use.<sup>3</sup> An informal survey of Australasian intensivists on social media groups raised the possibility of significant deficiencies in the availability of Personal Protective Equipment, and a lack of clear local policies to regulate and scrutinize their use. For instance, logistic difficulties with the availability of PPE and limitations on training personnel prevented one New South Wales hospital to fully adhere to the PPE guideline issued by the NSW Clinical Excellence Commission.<sup>4</sup> We propose to do a questionnaire survey to ascertain the availability and practices on PPE in Australasian ICUs. This may give important information for public policy planning in the midst of the current COVID-19 epidemic. It is expected that the results of this survey will be submitted for publication in a peer-reviewed journal.

## Methods

### Design and development of the survey questionnaire

The broad research topic (current state of personal protective equipment use in Australasian ICUs) was determined by discussions between intensivists and a clinical microbiologist. A literature search showed that there were no previous studies on this topic. With the input of the content experts, the following domains were chosen for the survey – risk factors for transmission were identified as location within the hospital for managing COVID patients, aerosol-generating procedures (method of oxygen-delivery, high-flow nasal prongs, noninvasive ventilation, intubation);

availability of PPE, practices on donning and doffing, training and education, N95 mask fit-testing, and staff satisfaction on the available measures in their hospital.

The first draft questionnaire (Version 1) was designed by the first author and given to 2 intensivists to improve clarity and minimize ambiguity. The redrafted questionnaire was retested for and finalized (attached).

### Distribution of the survey

An electronic questionnaire with the survey questions will be created using Google Forms™. Apart from the name of the hospital, no identifying details will be collected. The survey will be distributed by email, text messaging and/or WhatsApp to one intensivist from each Level 4, 5 and 6 ICU in Australasia. Two reminders will be emailed 3 days apart. The preamble to the form will contain the relevant information for participants, including contact details of the Principal Investigator and the Ethics Committee officer for lodgment of complaints. Consent is implied by their informed participation. No incentives will be offered, financial or otherwise.

### Statistical Analysis

The survey results will be expressed in numbers and percentages. Information will be collated per domain to summarize the available information.

### Data Storage and Retention:

The data will be downloaded from Google Forms and stored as a password-protected Microsoft Excel spreadsheet on the Principal Investigator's computer at Nepean ICU for a period of 5 years.

### References

1. Zhao S, Lin Q, Ran J, et al. Preliminary estimation of the basic reproduction number of novel coronavirus (2019-nCoV) in China, from 2019 to 2020: A data-driven analysis in the early phase of the outbreak. *Int J Infect Dis.* 2020;92:214-217.
2. Schwartz J KC, Yen M. Protecting Health Care Workers during the COVID-19 Coronavirus Outbreak –Lessons from Taiwan's SARS response. *Clinical Infectious Diseases.* 2020
3. Krein SL, Mayer J, Harrod M, et al. Identification and Characterization of Failures in Infectious Agent Transmission Precaution Practices in Hospitals: A Qualitative Study. *JAMA Intern Med.* 2018;178(8):1016-1057.
4. [http://www.cec.health.nsw.gov.au/keep-patients-safe/infection-prevention-and-control/Coronavirus-COVID-19/standard-and-transmission-based-precautions-including-ppe.](http://www.cec.health.nsw.gov.au/keep-patients-safe/infection-prevention-and-control/Coronavirus-COVID-19/standard-and-transmission-based-precautions-including-ppe)

# A Survey on the Current State of Personal Protective Equipment Use in Australasian Intensive Care Units in the Midst of the COVID-19 Pandemic

Principal Investigator – Dr Arvind Rajamani, Senior Staff Specialist, Nepean Hospital, Kingswood, NSW

Co-investigator – Dr Ashwin Subramaniam, Staff Specialist, Frankston Hospital, Frankston, VIC.

## Background

Australasia is currently in the midst of the COVID-19 pandemic with a rising number of infected patients requiring treatment in an Intensive Care Unit (ICU). The case fatality rate of COVID-19 infections has been estimated to be approximately 2.2%.<sup>1</sup> Health care workers (HCWs), particularly in the ICU, are susceptible to acquiring infections from infected patients.<sup>2</sup> Personal-protective equipment are the cornerstone of strategies to protect HCW from being infected with transmissible microbes. However, a qualitative study on infectious agent transmission precaution practices in hospitals identified a large number of potential breaches in PPE use.<sup>3</sup> An informal survey of Australasian intensivists on social media groups raised the possibility of significant deficiencies in the availability of Personal Protective Equipment, and a lack of clear local policies to regulate and scrutinize their use. For instance, logistic difficulties with the availability of PPE and limitations on training personnel prevented one New South Wales hospital to fully adhere to the PPE guideline issued by the NSW Clinical Excellence Commission.<sup>4</sup> We propose to do a questionnaire survey to ascertain the availability and practices on PPE in Australasian ICUs. This may give important information for public policy planning in the midst of the current COVID-19 epidemic. It is expected that the results of this survey will be submitted for publication in a peer-reviewed journal.

## Methods

### Design and development of the survey questionnaire

The broad research topic (current state of personal protective equipment use in Australasian ICUs) was determined by discussions between intensivists and a clinical microbiologist. A literature search showed that there were no previous studies on this topic. With the input of the content experts, the following domains were chosen for the survey – risk factors for transmission were identified as location within the hospital for managing COVID patients, aerosol-generating procedures (method of oxygen-delivery, high-flow nasal prongs, noninvasive ventilation, intubation); availability of PPE, practices on donning and doffing, training and education, N95 mask fit-testing, and staff satisfaction on the available measures in their hospital.

The first draft questionnaire (Version 1) was designed by the first author and given to 2 intensivists to improve clarity and minimize ambiguity. The redrafted questionnaire was retested for and finalized (attached).

## Distribution of the survey

An electronic questionnaire with the survey questions will be created using Google Forms™. Apart from the name of the hospital, no identifying details will be collected. The survey will be distributed by email (via relevant organisations the CPI is part of or has access to) , text messaging and/or WhatsApp to one intensivist from each Level 4, 5 and 6 ICU departments as well as Emergency Departments throughout Australasia. Two reminders will be emailed 3 days apart. The preamble to the form will contain the relevant information for participants, including contact details of the Principal Investigator and the Ethics Committee officer for lodgment of complaints. Consent is implied by their informed participation. No incentives will be offered, financial or otherwise.

## Statistical Analysis

The survey results will be expressed in numbers and percentages. Information will be collated per domain to summarize the available information.

## Data Storage and Retention:

The data will be downloaded from Google Forms and stored as a password-protected Microsoft Excel spreadsheet on the Principal Investigator's computer at Nepean ICU for a period of 5 years.

## References

1. Zhao S, Lin Q, Ran J, et al. Preliminary estimation of the basic reproduction number of novel coronavirus (2019-nCoV) in China, from 2019 to 2020: A data-driven analysis in the early phase of the outbreak. *Int J Infect Dis.* 2020;92:214-217.
2. Schwartz J KC, Yen M. Protecting Health Care Workers during the COVID-19 Coronavirus Outbreak –Lessons from Taiwan's SARS response. *Clinical Infectious Diseases.* 2020
3. Krein SL, Mayer J, Harrod M, et al. Identification and Characterization of Failures in Infectious Agent Transmission Precaution Practices in Hospitals: A Qualitative Study. *JAMA Intern Med.* 2018;178(8):1016-1057.
4. [http://www.cec.health.nsw.gov.au/keep-patients-safe/infection-prevention-and-control/Coronavirus-COVID-19/standard-and-transmission-based-precautions-including-ppe.](http://www.cec.health.nsw.gov.au/keep-patients-safe/infection-prevention-and-control/Coronavirus-COVID-19/standard-and-transmission-based-precautions-including-ppe)



# Personal Protective Equipment Use in Asia-Pacific Intensive Care Units during the COVID-19 Pandemic

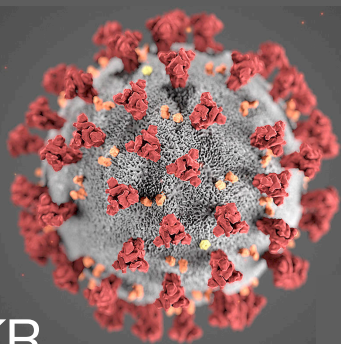

Rajamani A, Subramaniam A, Shekar K, Alcancia C, Bihari S, Gullapalli N, Haji J, Luo J, Renner M, Wong WT, Ramanathan KR

**Objective** To evaluate **Preparedness Use Training** vs. **World Health Organization**

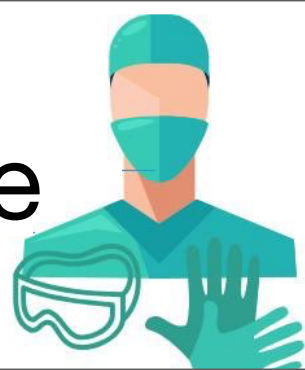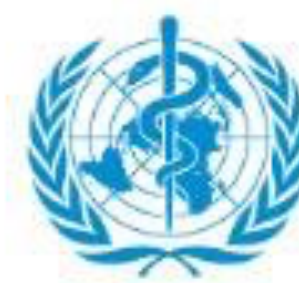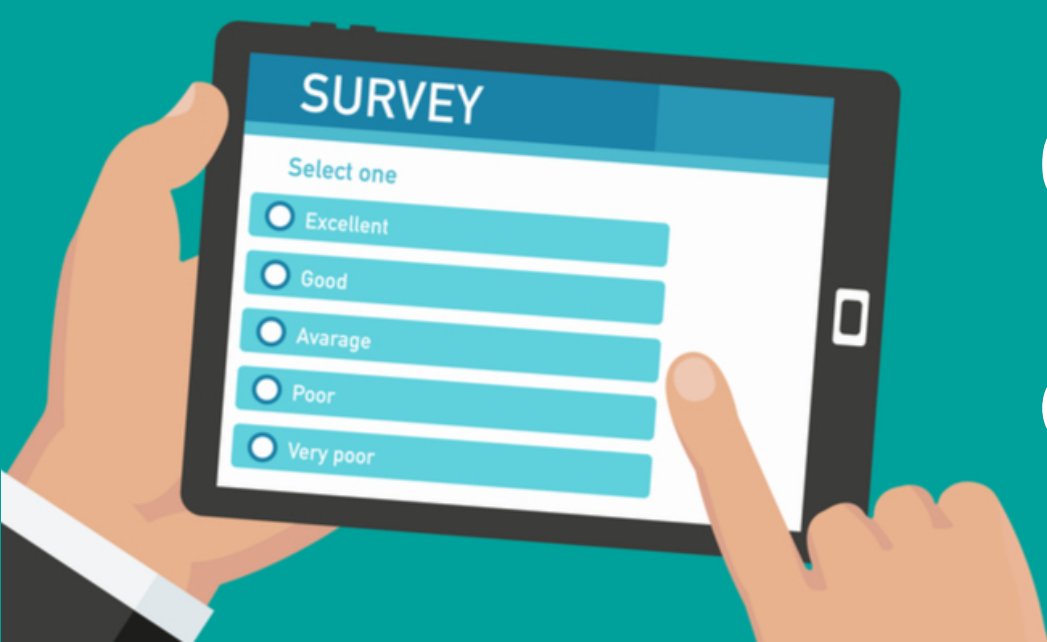

633 Intensivists surveyed from 6 countries

Overall responses rate **42%** (263/633)

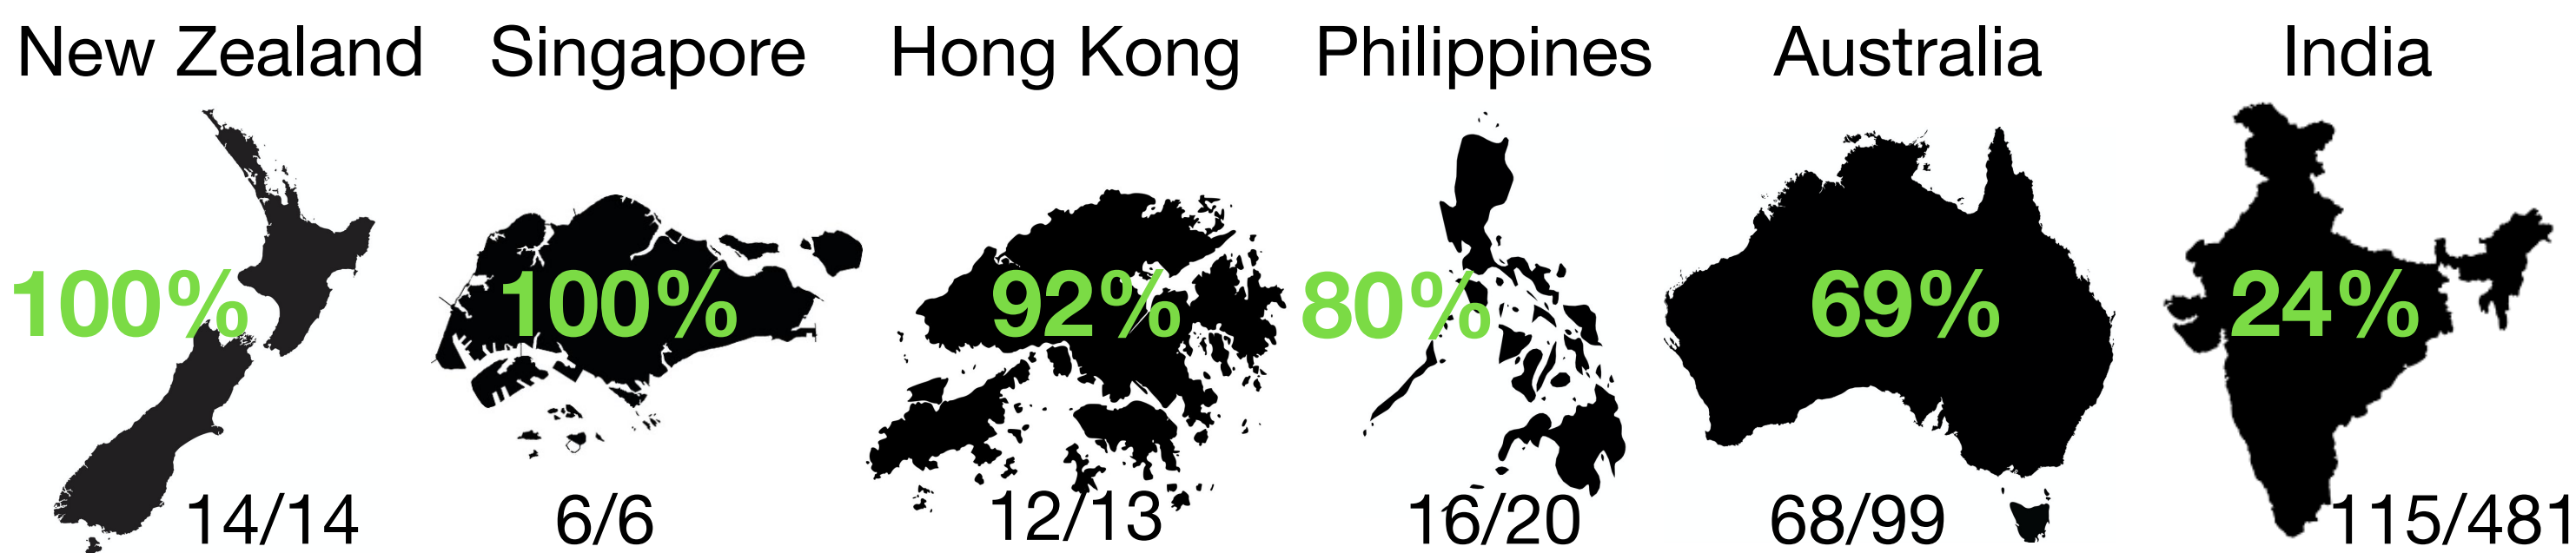

**97%** Conformed to **World Health Organization**

| Country                           | Preferred PPE        | Usage Frequency     |
|-----------------------------------|----------------------|---------------------|
| Australia, India, New Zealand     | Preferred <b>AGP</b> | Only for AGP        |
| Singapore, Hong Kong, Philippines | Preferred            | <b>All the time</b> |

**Disposition of patient needing HFNO / NIV**

- 37%** Negative-pressure room (highest in HK & Singapore)
- 58%** Non-negative pressure room If necessary
- 5%** Negative-flow room

Reluctance expressed by countries with past pandemic experience (Hong Kong & Singapore)

Not to use in patients

HFNO **58%**  
NIV **81%**

## TRAINING

## PPE Stock

## Perception

- ✓ Donning / Doffing PPE
- ⚠ COVID Intubation
- ✗ "Buddy-System"
- ✗ Showering end of shift
- ✗ Transporting COVIDs
- ✗ Waste disposal

✓ **83-92% aware**  
From NZ, HK & Singaporean ICU

⚠ **41-56% unaware**  
From Australian, Indian & Philippine ICU

⚠ **28% Felt Safe**

✗ **29% Felt Unsafe**  
Australia, India & Philippines felt **PPE practice was suboptimal**
